# Supplementary material for: Live imaging of excitable axonal microdomains in ankyrin-G-GFP mice
Source: eLife. 2025 Feb 3;12:RP87078. doi: 10.7554/eLife.87078 (PMC11790247; doi:10.7554/eLife.87078)
Supplement: Supplementary file 1. — Sheet 1 A: Summary of statistics for passive and active properties (related to Figure 7). Sheet 1B: Summary of Cre viruses and Cre driver lines used in the study. Sheet 1 C: Specification of primary and secondary antibodies. Sheet 1D: Summary of fixation and blocking reagents used for all immunofluorescence experiments. Sheet References: List of references related to the materials provided in the supplementary file. [file elife-87078-supp1.xlsx]

## Sheet: 1A
Summary of statistics for passive and active properties (related to Figure 7)
stats		wildtype					AnkG-GFP					AnkG-GFP+Cre					ANOVA	-Cre / +Cre
		N	mean	median	SD		N	mean	median	SD		N	mean	median	SD		p(A) / p(KW)	Tukey / Dunn
RMP		28	-63.29	-63.56	3.78		22	-62.57	-63.43	4.62		42	-64.14	-63.32	4.173		0.3441	0.3299
Rinput		27	257.2	251.2	75.57		22	210.3	203.1	49.55		40	239.4	233	74.93		0.069	0.2642
Ih sag		28	22.25	22.01	8.67		23	22.84	23.3	8.639		42	25.06	28.05	9.906		0.2529	0.9863
rheobase		28	52.16	44.86	30.9		23	70.86	69.81	36.43		40	65.43	69.81	28.51		0.0789	>0,9999
ISI (ratio 1/6)		27	2.547	2.315	1.002		22	2.385	2.114	0.682		42	1.983	1.864	0.47		0.0038	0.0446
maxAP		27	12.04	11	2.594		22	9.773	10	2.045		42	10.52	10	2.482		0.0044	0.4686
IhalfmaxAP		27	102.4	96.82	39.97		22	122.2	120.1	32.56		42	122.9	116.3	46.33		0.0576	>0,9999
AP thesh		28	-39	-38.45	2.748		22	-38.85	-38.92	2.735		42	-36.91	-36.54	3.41		0.0098	0.0628
AP amp.		28	84.98	86.78	10.9		23	88.85	90.03	7.732		42	90.29	91.51	6.92		0.0396	0.792
AP hw		28	2.05	2.04	0.2605		23	1.908	1.881	0.2129		42	1.943	1.911	0.2092		0.0546	>0,9999
AP rise		28	0.5414	0.535	0.116		23	0.5032	0.485	0.07493		42	0.4563	0.445	0.07704		0.0013	0.0568
AP decay		28	2.185	2.188	0.4115		23	2.07	2.029	0.305		42	2.187	2.203	0.2718		0.2392	0.2728
EPSP amp.		27	0.5856	0.5922	0.08447		22	0.5891	0.5937	0.09796		42	0.6142	0.5818	0.1199		0.8246	>0,9999
EPSP frequ.		27	0.4749	0.3111	0.6106		22	0.4936	0.3156	0.4998		42	0.4041	0.2509	0.4145		0.6986	>0,9999
underlined:		non-parametric test				red:		statistically significant
multiple comparisons:				ISI (ratio 1/6)		AnkG-GFP+Cre is different from both others
significant pairs:				maxAP		Wildtype is different from both Ank-GFP groups
				AP thesh		wildtype vs. ankg-GFP+cre
				AP amp.		wildtype is different to ankG-GFP+Cre
				AP rise		wildtype vs ankG-GFP+Cre

## Sheet: 1B
Summary of Cre viruses and Cre driver lines
Neuron population	Cre virus / line	Common name	Source, strain
Unspecific	FUW-nGFP::Cre (lentiviral vector), CMV promotor	nGFP-Cre, NA	Gift from the Südhof lab, Stanford University, CA, USA
Unspecific	FUW-nGFP:: ΔCre (lentiviral vector), CMV promotor	nGFP-ΔCre, NA	Gift from the Südhof lab, Stanford University, CA, USA
Excitatory neurons	pENN.AAV.CamKII 0.4.Cre.SV40	CaMKII-Cre	Addgene viral prep #105558-AAV5, Lot: v7050
Neurons (unspecific)	ENN.AAV.hSyn.Cre.WPRE.hGH	Synapsin-Cre	Addgene viral prep #105553-AAV1, Lot: v75882
Inhibitory neurons	AAV1-hDlx-Flex-dTomato-Fishell_7	hDlx-tdTomato	Addgene viral prep #83894-AAV1
Neurons (unspecific)	pAAV-hSyn-Cre-P2A-dTomato	Synapsin-Cre-tdTomato	Addgene viral prep 107738-AAVrg, Lot: v75881
Excitatory neurons	B6.Cg-Tg(Camk2a-Cre)T29-1Stl/J	T29-1	The Jackson Laboratory
		IMSR_JAX:005359	Strain # 005359
Parvalbumin-pos. interneurons with tdTomato	B6;129P2-Pvalbtm1(Cre)Arbr/J	B6 PVCre	The Jackson Laboratory
	crossed with	IMSR_JAX:017320	Strain # 017320
	B6.Cg-GT(ROSA)26Sortm14(CAG-tdTomato)/Hze/J
		Ai14	Strain # 007914
		IMSR_JAX:007914
Unspecific	AAV-retro/2-hSyn1-mCherry-iCre-WRPE-hGHp(A)	Retro-mCherry-Cre	University of Zürich, Viral Vector Facility, v230

## Sheet: 1C
Specification of primary and secondary antibodies (catalog number, working dilution, previously conducted controls, sources, Research Resource Identification Portal (RRID) code and references where available)
Primary Antibody	Dilution	Reported controls				Source & Catalog Number
Clone/type		KO	IF	IP	WB	RRID or other reference
Ankyrin-G (rb)	1:500		X		X	Santa Cruz Biotechnology, Heidelberg, Germany; sc-28561; AB_ 633909
Ankyrin-G (gp)	1:1000		X		X	Synaptic Systems, Göttingen, Germany; 386 005; [1]
Ankyrin-G (ms), N106/36	1:500	X	X		X	UC Davis/NIH NeuroMab Facility, CA, USA; 73-146; AB_2315803
ank-G C-terminus	1:200		X			Santa Cruz Biotechnology, Heidelberg, Germany; sc-28561; discontinued
ßIV-spectrin (rb)	1:1000	X	X		X	Self-made; [2-4]
Caspr (ms), K65/35	1:500	X	X	X	X	UC Davis/NIH NeuroMab Facility, CA, USA; 75-001; AB_2083496
FGF14 (ms), N56/21	1:500	X	X	X	X	UC Davis/NIH NeuroMab Facility, CA, USA; 75-096; AB_2104060
GFP (ch)	1:1000		X			Acris Antibodies GmbH, Hiddenhausen, Germany; AP20142PU-N; AB_10756183
Iba1 (rb)	1:2000		X			Wako, Neuss, Germany; 019-19741; AB_839504
Kv1.2 (ms), K14/16	1:200	X	X	X	X	UC Davis/NIH NeuroMab Facility, CA, USA; 73-008; AB_2296313
Kv2.1 (ms), K89/34	1:1000	X	X		X	UC Davis/NIH NeuroMab Facility, CA, USA; 75-014-020; AB_2877280
Nav1.6 (rb)	1:2000		X		X	Alomone Labs, Jerusalem, Israel; ASC-009; AB_2040202
NeuN (ms), A60	1:500		X		X	Millipore, Temecula, CA, USA; MAB377; AB_2314889
NeuN (gp)	1:2000		X			Synaptic Systems, Göttingen, Germany 266 004; AB_2619988
Parvalbumin (rb)	1:500		X		X	Swant Inc., Marly, Switzerland; PV27; AB_2631173
Synaptopodin (gp)	1:500		X		X	Synaptic Systems, Göttingen, Germany 163 004; AB_10549419
TRIM46 (ms), SMP14, (aka MDM2)	1:500		X		X	Santa Cruz Biotechnology, Heidelberg, Germany; sc-965; AB_627920
vGAT (ch)	1:1000		X			Synaptic Systems, Göttingen, Germany 131 006; AB_2619820
Secondary Antibody	Dilution	Reported controls				Source & Catalog Number
Clone/type		KO	IF	IP	WB	RRID or other reference
FluoTag-X4-anti GFP-StarRED; 1H1/1B2	1:500					NanoTag Technologies, Göttingen, Germany; N0304; AB_2744631
gt anti mouse abberior STAR 580	1:100					Abberior GmbH, Göttingen, Germany; ST580-1001; AB_2923543
gt anti rabbit; abberior STAR 580	1:100					Abberior GmbH, Göttingen, Germany; ST580-1002; AB_2910107
gt anti ch; Alexa Fluor 488	1:1000					Molecular Probes, Thermo Fisher, Karlsruhe, Germany; A-11039; AB_ 42924
gt anti ms; Alexa Fluor 568	1:1000					Molecular Probes, Thermo Fisher, Karlsruhe, Germany; A-11004; AB_143162
gt anti rb; Alexa Fluor 568	1:1000					Molecular Probes, Thermo Fisher, Karlsruhe, Germany; A-21069; AB_141416
gt anti gp; Alexa Fluor 568	1:1000					Molecular Probes, Thermo Fisher, Karlsruhe, Germany; A-11075; AB_ 141954
gt anti ch; Alexa Fluor 568	1:1000					Molecular Probes, Thermo Fisher, Karlsruhe, Germany; A-11041; AB_2534098
gt anti ms; Alexa Fluor 594	1:500					Molecular Probes, Thermo Fisher, Karlsruhe, Germany; A-21125; AB_141593
gt anti rb; Alexa Fluor 594	1:500					Molecular Probes, Thermo Fisher, Karlsruhe, Germany; A-11012; AB_141359
gt anti ms; Alexa Fluor 647	1:500					Molecular Probes, Thermo Fisher, Karlsruhe, Germany; AB_2535804-21235
gt anti rb; Alexa Fluor 647	1:500					Molecular Probes, Thermo Fisher, Karlsruhe, Germany; A-21244; AB_2535812
gt anti gp; Alexa Fluor 647	1:500					Molecular Probes, Thermo Fisher, Karlsruhe, Germany; A-21450; AB_2735091
gt anti ch; Alexa Fluor 647	1:500					Molecular Probes, Thermo Fisher, Karlsruhe, Germany; A-21449; AB_2535866
Alexa Streptavidin 568	1:1000					Molecular Probes, Thermo Fisher, Karlsruhe, Germany; S11226; AB_2315774
KO absence of immunosignal in knock out animals, IF immunofluorescence, IP immuno-precipitation, WB western blot, rb rabbit, ms mouse, gp guinea pig, ch chicken

## Sheet: 1D
Summary of fixation and blocking reagents for all immunofluorescence experiments
Sample	Fixation Time / DIV	Post Fix	Blocking buffer (B); Incubation buffer (I)
Isolated hippocampal neurons	4% PFA, 15 min; DIV 19	No	B: 1% BSA in PBS. Prior to blocking, quench in PBS with 100 mM glycine, 100 mM ammonium chloride (5 min) and application of 0.1% Triton X-100 for 5 min
			I: PBS
Hippocampal OTC	4% PFA, 30 min	No	B: 0.1% Triton X-100, 1% BSA, 0.2% fish skin gelatine, in 1 x PBS
			I: same
Ex vivo acute slices	2% PFA, 90 min	No	B: 0.3% Triton X-100, 5% normal goat serum in 1 x PBS
			I: 0.2% Triton X-100, 1% normal goat serum in 1 x PBS
Whole mount retina	4% PFA, 15 min; >P55	No	B: 0.5% Triton X-100, 0.2% BSA, 0.02% sodium azide in 1x PBS
			I: 1% Triton X-100, 10% FCS and 0.02% sodium azide in 1x PBS
Cryosections	Perfusion, 15 min; 2% PFA (for ion channels); 4% PFA (for all others); >P28	No	B: 1% BSA, 0.2% fish skin gelatine, 0.1% Triton X-100 in 1 x PBS
			I: same
PFA paraformaldehyde, min minutes, DIV days in vitro, BSA bovine serum albumin, PBS phosphate buffered saline, FCS fetal calf serum

## Sheet: references
References
1	Schlüter, A., et al., Dynamic regulation of synaptopodin and the axon initial segment in retinal ganglion cells during postnatal development Frontiers Cell Neurosci, 2019.
2	Gutzmann, A., et al., A period of structural plasticity at the axon initial segment in developing visual cortex. Front Neuroanat, 2014. 8: p. 11.
3	Freal, A., et al., Cooperative Interactions between 480 kDa Ankyrin-G and EB Proteins Assemble the Axon Initial Segment. J Neurosci, 2016. 36(16): p. 4421-33.
4	Höfflin, F., et al., Heterogeneity of the Axon Initial Segment in Interneurons and Pyramidal Cells of Rodent Visual Cortex. Front Cell Neurosci, 2017. 11: p. 332.
